# Supplementary material
Source: PubMed Central journal article supplement (PMC8628303)

**Supplementary Information for “MALDI Mass Spectrometry Imaging in a Primary Demyelination Model of Murine Spinal Cords”** by Emily R. Sekera,<sup>1</sup> Darpan Saraswat,<sup>2</sup> Kevin J. Zemaitis,<sup>1</sup> Fraser J. Sim,<sup>2</sup> and Troy D. Wood<sup>1\*</sup>

**Table S1. Top 25 m/z in the Control Section Based on the Equated Pearson Correlation (n = 3).**

| Ranking | m/z      | correlation | M1     | M2     |
|---------|----------|-------------|--------|--------|
| 1       | 496.343  | 1           | 1      | 1      |
| 2       | 732.650  | 0.8843388   | 0.8366 | 0.8366 |
| 3       | 731.625  | 0.86776     | 0.8366 | 0.8366 |
| 4       | 577.534  | 0.8595857   | 0.7837 | 0.7837 |
| 5       | 248.183  | 0.8587007   | 0.8354 | 0.8354 |
| 6       | 784.595  | 0.8483514   | 0.7825 | 0.7825 |
| 7       | 733.603  | 0.8416425   | 0.756  | 0.756  |
| 8       | 758.595  | 0.8333636   | 0.7917 | 0.7917 |
| 9       | 365.830  | 0.8331041   | 0.8366 | 0.8366 |
| 10      | 759.581  | 0.8169438   | 0.7883 | 0.7883 |
| 11      | 380.303  | 0.8133262   | 0.7802 | 0.7802 |
| 12      | 380.797  | 0.8125086   | 0.7871 | 0.7871 |
| 13      | 720.588  | 0.7965343   | 0.7675 | 0.7675 |
| 14      | 735.586  | 0.7909163   | 0.7952 | 0.7952 |
| 15      | 734.557  | 0.7889386   | 0.7894 | 0.7894 |
| 16      | 367.296  | 0.7885805   | 0.7917 | 0.7917 |
| 17      | 253.552  | 0.7884472   | 0.756  | 0.756  |
| 18      | 760.570  | 0.7869545   | 0.7422 | 0.7422 |
| 19      | 761.635  | 0.7836034   | 0.7434 | 0.7434 |
| 20      | 367.810  | 0.7789616   | 0.7906 | 0.7906 |
| 21      | 244.880  | 0.7789535   | 0.7871 | 0.7871 |
| 22      | 391.806  | 0.7755557   | 0.6697 | 0.6697 |
| 23      | 253.882  | 0.7743311   | 0.7699 | 0.7699 |
| 24      | 736.617  | 0.7735018   | 0.7883 | 0.7883 |
| 25      | 1542.203 | 0.7706027   | 0.7411 | 0.7411 |

M1 and M2 correlate to the Manders' co-localization coefficient.

**Table S2. Top 25 *m/z* in the 7 dpI Section Based on the Equated Pearson Correlation (n = 3).**

| Ranking | <i>m/z</i> | correlation | M1       | M2       |
|---------|------------|-------------|----------|----------|
| 1       | 496.343    | 1           | 1        | 1        |
| 2       | 760.570    | 0.8855853   | 0.799337 | 0.799337 |
| 3       | 761.635    | 0.8795073   | 0.79602  | 0.79602  |
| 4       | 380.303    | 0.8599661   | 0.794362 | 0.794362 |
| 5       | 762.626    | 0.8410172   | 0.784411 | 0.784411 |
| 6       | 808.570    | 0.8270669   | 0.767828 | 0.767828 |
| 7       | 732.576    | 0.8262135   | 0.787728 | 0.787728 |
| 8       | 253.526    | 0.8066901   | 0.764511 | 0.764511 |
| 9       | 810.594    | 0.8045615   | 0.74461  | 0.74461  |
| 10      | 731.625    | 0.798963    | 0.802653 | 0.802653 |
| 11      | 577.534    | 0.7983043   | 0.74461  | 0.74461  |
| 12      | 783.576    | 0.78916     | 0.73466  | 0.73466  |
| 13      | 758.595    | 0.7872138   | 0.741294 | 0.741294 |
| 14      | 811.649    | 0.7866043   | 0.736318 | 0.736318 |
| 15      | 380.797    | 0.7863408   | 0.771144 | 0.771144 |
| 16      | 782.558    | 0.7862881   | 0.729685 | 0.729685 |
| 17      | 785.616    | 0.7725437   | 0.752902 | 0.752902 |
| 18      | 784.595    | 0.7601618   | 0.719735 | 0.719735 |
| 19      | 524.354    | 0.7527635   | 0.728027 | 0.728027 |
| 20      | 733.603    | 0.7521618   | 0.757877 | 0.757877 |
| 21      | 790.660    | 0.7474787   | 0.746269 | 0.746269 |
| 22      | 759.657    | 0.7447933   | 0.749585 | 0.749585 |
| 23      | 723.476    | 0.7436856   | 0.703151 | 0.703151 |
| 24      | 724.490    | 0.7372875   | 0.713101 | 0.713101 |
| 25      | 763.618    | 0.7363802   | 0.749585 | 0.749585 |

M1 and M2 correlate to the Manders' co-localization coefficient.

**Table S3. Top 25 *m/z* in the 14 dpI Section Based on the Equated Pearson Correlation (n = 3).**

| Ranking | <i>m/z</i> | correlation | M1       | M2       |
|---------|------------|-------------|----------|----------|
| 1       | 496.343    | 1           | 1        | 1        |
| 2       | 732.576    | 0.8711225   | 0.817585 | 0.817585 |
| 3       | 497.337    | 0.8673934   | 0.799213 | 0.799213 |
| 4       | 782.558    | 0.8598061   | 0.824147 | 0.824147 |
| 5       | 783.576    | 0.857214    | 0.816273 | 0.816273 |
| 6       | 733.603    | 0.8571726   | 0.784777 | 0.784777 |
| 7       | 391.297    | 0.8481784   | 0.809711 | 0.809711 |
| 8       | 391.141    | 0.8428891   | 0.809711 | 0.809711 |
| 9       | 758.595    | 0.8108342   | 0.783465 | 0.783465 |
| 10      | 720.588    | 0.8023305   | 0.783465 | 0.783465 |
| 11      | 391.806    | 0.7964762   | 0.748032 | 0.748032 |
| 12      | 260.882    | 0.7960478   | 0.75853  | 0.75853  |
| 13      | 784.595    | 0.7917897   | 0.791339 | 0.791339 |
| 14      | 759.581    | 0.7908774   | 0.778215 | 0.778215 |
| 15      | 577.534    | 0.7902944   | 0.782152 | 0.782152 |
| 16      | 731.625    | 0.7800646   | 0.784777 | 0.784777 |
| 17      | 723.476    | 0.7661762   | 0.776903 | 0.776903 |
| 18      | 380.303    | 0.7630641   | 0.787402 | 0.787402 |
| 19      | 518.307    | 0.7613063   | 0.744095 | 0.744095 |
| 20      | 380.797    | 0.7566262   | 0.783465 | 0.783465 |
| 21      | 804.537    | 0.7529455   | 0.728347 | 0.728347 |
| 22      | 808.570    | 0.7512867   | 0.740158 | 0.740158 |
| 23      | 810.594    | 0.7500658   | 0.737533 | 0.737533 |
| 24      | 745.509    | 0.7431823   | 0.728347 | 0.728347 |
| 25      | 761.635    | 0.7420141   | 0.782152 | 0.782152 |

M1 and M2 correlate to the Manders' co-localization coefficient.

**Table S4. Top 25 *m/z* in the 28 dpI Section Based on the Equated Pearson Correlation (n = 2).**

| Ranking | <i>m/z</i> | correlation | M1    | M2    |
|---------|------------|-------------|-------|-------|
| 1       | 496.343    | 1           | 1     | 1     |
| 2       | 732.576    | 0.9073122   | 0.842 | 0.842 |
| 3       | 782.558    | 0.8962942   | 0.822 | 0.822 |
| 4       | 783.576    | 0.8960431   | 0.826 | 0.826 |
| 5       | 733.603    | 0.8778388   | 0.802 | 0.802 |
| 6       | 731.625    | 0.8622493   | 0.856 | 0.856 |
| 7       | 758.595    | 0.8567485   | 0.824 | 0.824 |
| 8       | 577.534    | 0.8516148   | 0.824 | 0.824 |
| 9       | 723.476    | 0.8509324   | 0.8   | 0.8   |
| 10      | 784.595    | 0.8479682   | 0.828 | 0.828 |
| 11      | 760.570    | 0.8268713   | 0.82  | 0.82  |
| 12      | 391.297    | 0.8268091   | 0.786 | 0.786 |
| 13      | 761.635    | 0.8229695   | 0.826 | 0.826 |
| 14      | 808.570    | 0.8137183   | 0.814 | 0.814 |
| 15      | 804.537    | 0.8135809   | 0.792 | 0.792 |
| 16      | 734.557    | 0.8088015   | 0.788 | 0.788 |
| 17      | 735.586    | 0.8080369   | 0.794 | 0.794 |
| 18      | 724.490    | 0.8051679   | 0.744 | 0.744 |
| 19      | 736.617    | 0.8026913   | 0.798 | 0.798 |
| 20      | 380.303    | 0.8019672   | 0.818 | 0.818 |
| 21      | 736.322    | 0.798303    | 0.798 | 0.798 |
| 22      | 810.594    | 0.7964232   | 0.738 | 0.738 |
| 23      | 367.296    | 0.7958765   | 0.81  | 0.81  |
| 24      | 253.552    | 0.792308    | 0.814 | 0.814 |
| 25      | 694.552    | 0.7915833   | 0.744 | 0.744 |

M1 and M2 correlate to the Manders' co-localization coefficient.

**Table S5. Top 25 m/z in the Shiverer Section Based on the Equated Pearson Correlation (n = 2).**

| Ranking | m/z      | correlation | M1     | M2     |
|---------|----------|-------------|--------|--------|
| 1       | 496.343  | 1           | 1      | 1      |
| 2       | 367.296  | 0.8685552   | 0.8996 | 0.8996 |
| 3       | 734.557  | 0.8667451   | 0.8952 | 0.8952 |
| 4       | 735.586  | 0.866539    | 0.8952 | 0.8952 |
| 5       | 756.549  | 0.8660826   | 0.8908 | 0.8908 |
| 6       | 697.476  | 0.863227    | 0.8777 | 0.8777 |
| 7       | 758.595  | 0.8594192   | 0.8079 | 0.8079 |
| 8       | 244.880  | 0.8547116   | 0.9039 | 0.9039 |
| 9       | 820.544  | 0.8516547   | 0.7991 | 0.7991 |
| 10      | 736.617  | 0.8500314   | 0.8908 | 0.8908 |
| 11      | 757.533  | 0.8478195   | 0.8952 | 0.8952 |
| 12      | 367.810  | 0.8477932   | 0.9039 | 0.9039 |
| 13      | 698.523  | 0.841234    | 0.869  | 0.869  |
| 14      | 731.625  | 0.8390675   | 0.821  | 0.821  |
| 15      | 1542.203 | 0.8366406   | 0.7642 | 0.7642 |
| 16      | 784.595  | 0.8276637   | 0.8559 | 0.8559 |
| 17      | 783.576  | 0.8108438   | 0.6725 | 0.6725 |
| 18      | 1544.210 | 0.8076435   | 0.7904 | 0.7904 |
| 19      | 762.626  | 0.8074271   | 0.8384 | 0.8384 |
| 20      | 1521.219 | 0.8071614   | 0.7729 | 0.7729 |
| 21      | 577.534  | 0.8066179   | 0.7991 | 0.7991 |
| 22      | 782.558  | 0.8058313   | 0.655  | 0.655  |
| 23      | 723.476  | 0.8056864   | 0.7424 | 0.7424 |
| 24      | 551.514  | 0.8039598   | 0.8777 | 0.8777 |
| 25      | 1495.129 | 0.8033508   | 0.869  | 0.869  |

M1 and M2 correlate to the Manders' co-localization coefficient.

## Supplementary Figure S1.

SSC segmentation analysis of sections after lysolecithin injection (3, 7, 14, 28 dpl) and *shiverer* model.

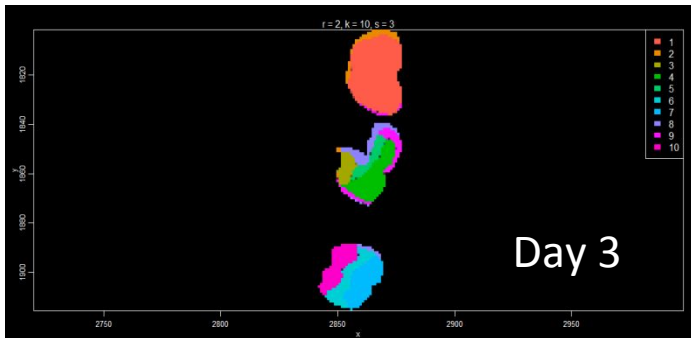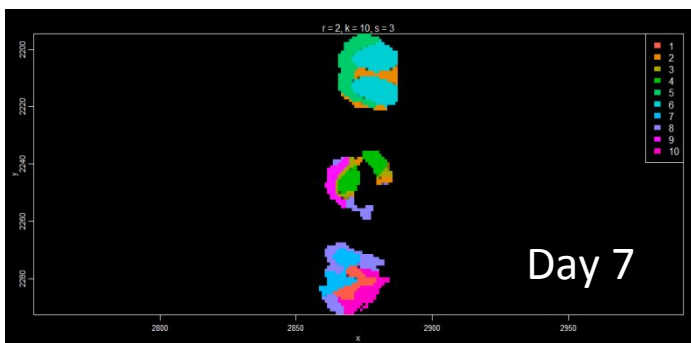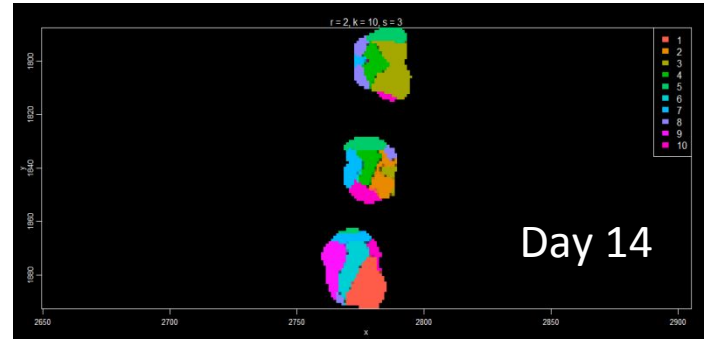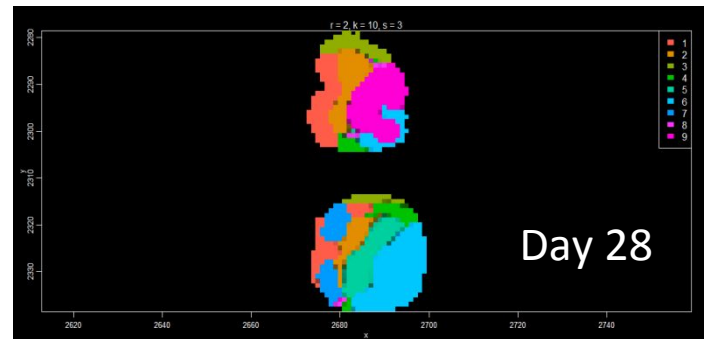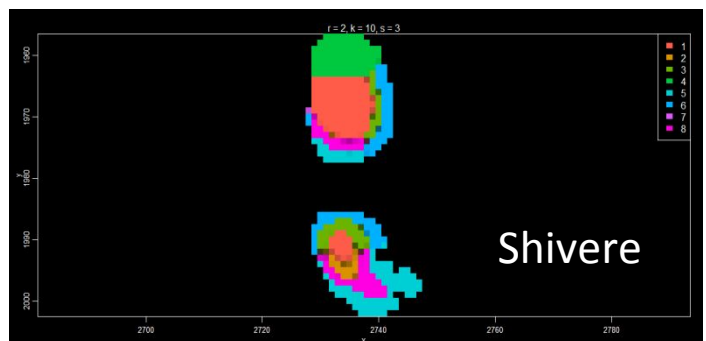

**Supplementary Figure S2.** MALDI mass spectra over the range  $m/z$  480-1000 for average of A) three sections for 3 dpl, B) three sections for 7 dpl, C) three sections for 14 dpl, D) two sections for 28 dpl, and E) two sections for *shiverer* model.

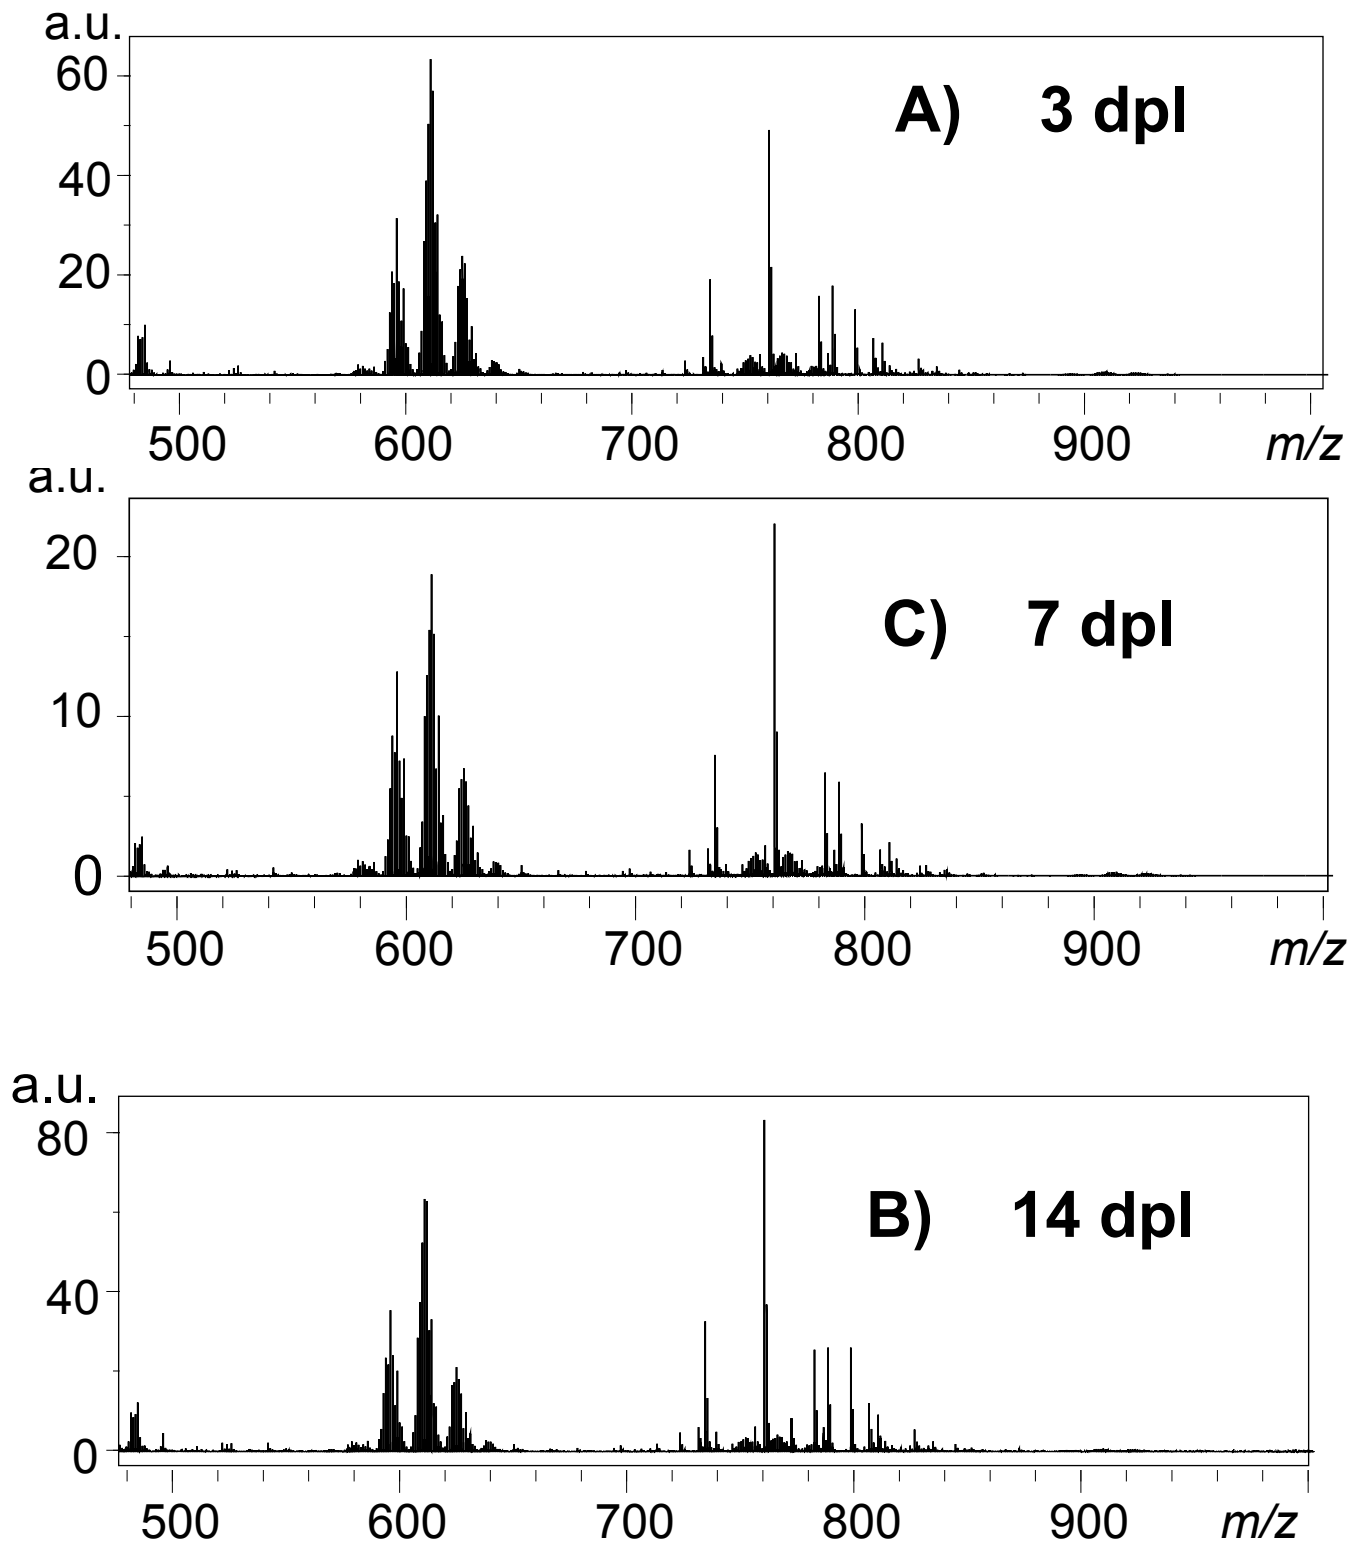



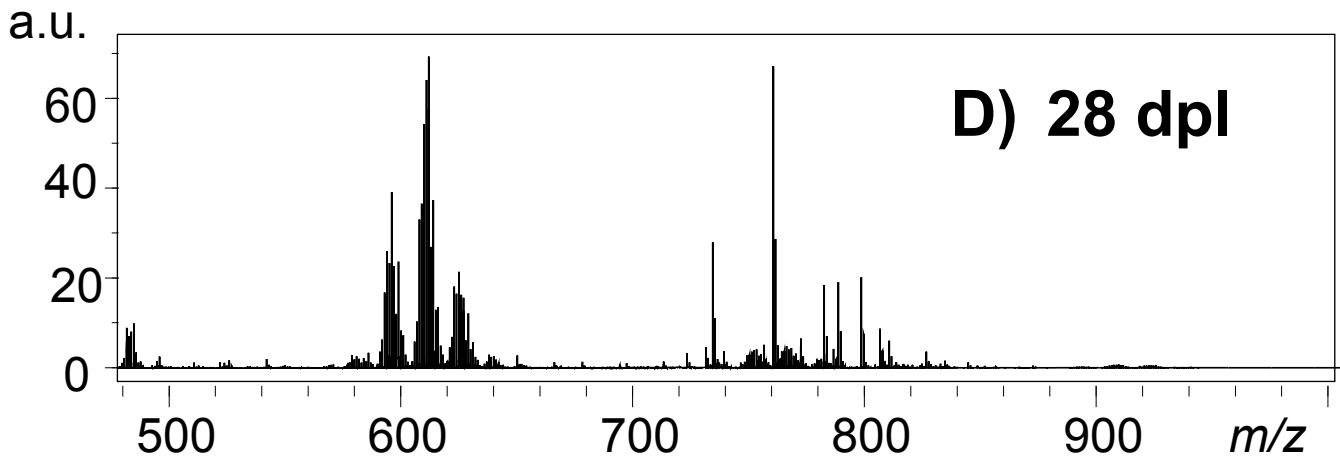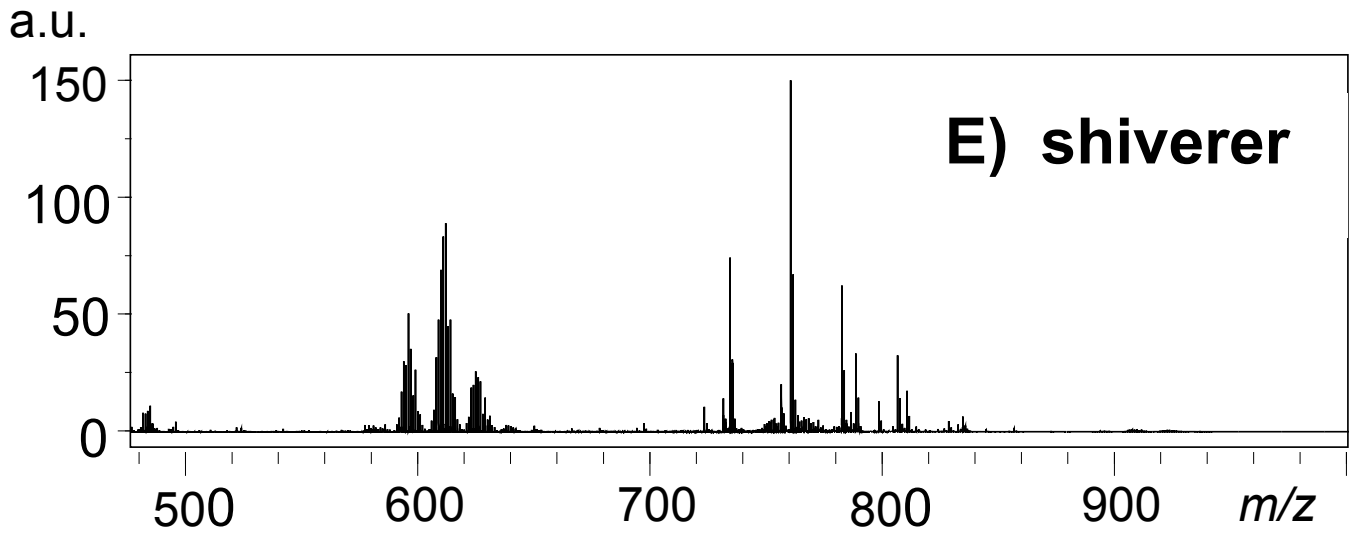

### Supplementary Figure S3.

Reproducibility of the MALDI MSI of spinal cord tissues using the (M+H)<sup>+</sup> and (M+Na)<sup>+</sup> ions from 16:0 and 18:0 LPCs: A) 3 dpl, B) 7 dpl, C) 14 dpl, D) 28 dpl, and E) uninjured spinal cord sections.

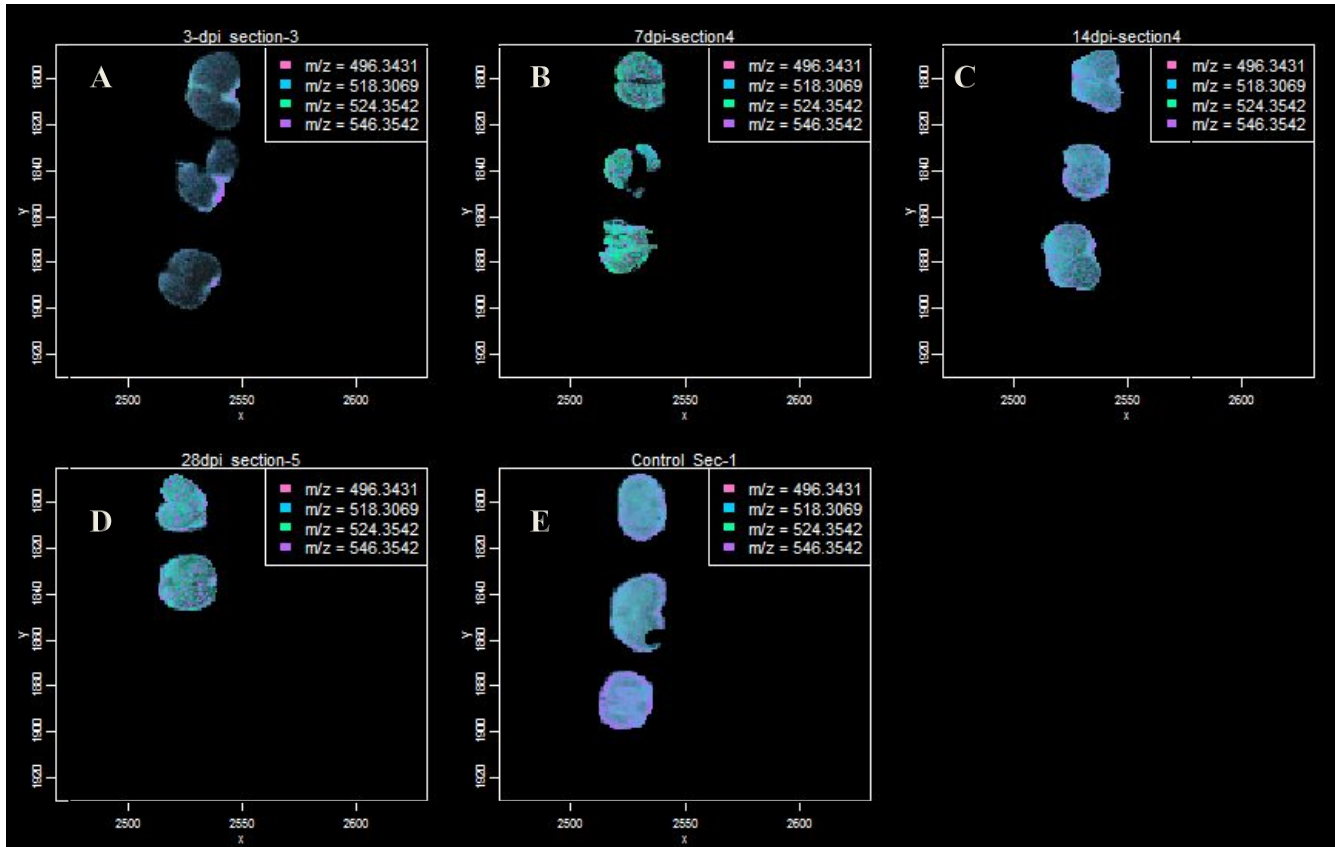

### Supplementary Figure S4.

PCA analysis of the full mass spectrum of the top three components in images of A) 3 dpi WT, B) 7 dpi, C) 14 dpi, D) 28 dpi, and E) control spinal cord sections. Principle component 1, 2, and 3 are shown from left to right, respectively.

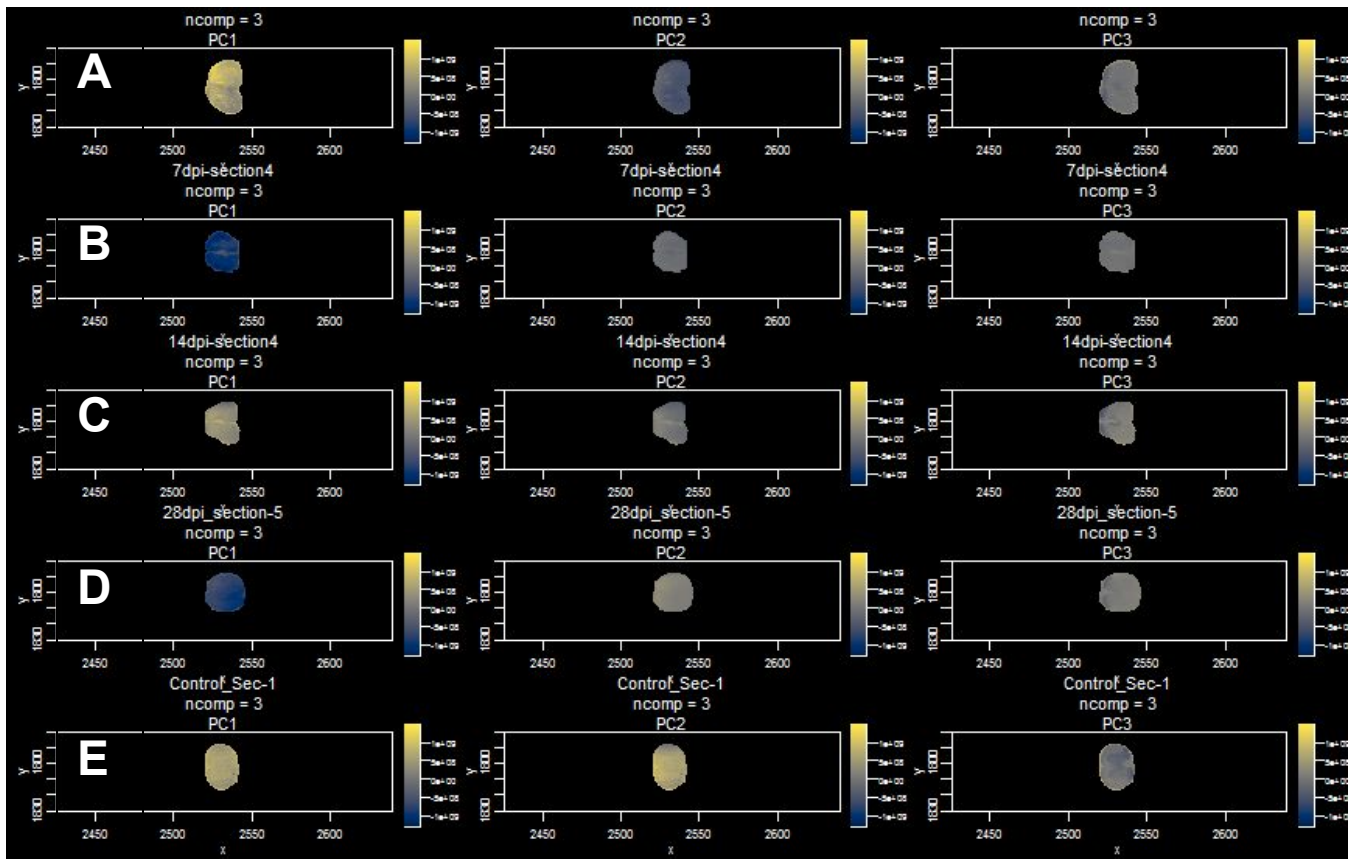

**Supplementary Figure S5.** PCA analysis of the  $m/z$  range 700 – 1000 Da of the top three components in images of A) 3 dpi WT, B) 7 dpi, C) 14 dpi, D) 28 dpi, and E) control spinal cord sections. Principle component 1, 2, and 3 are shown from left to right, respectively.

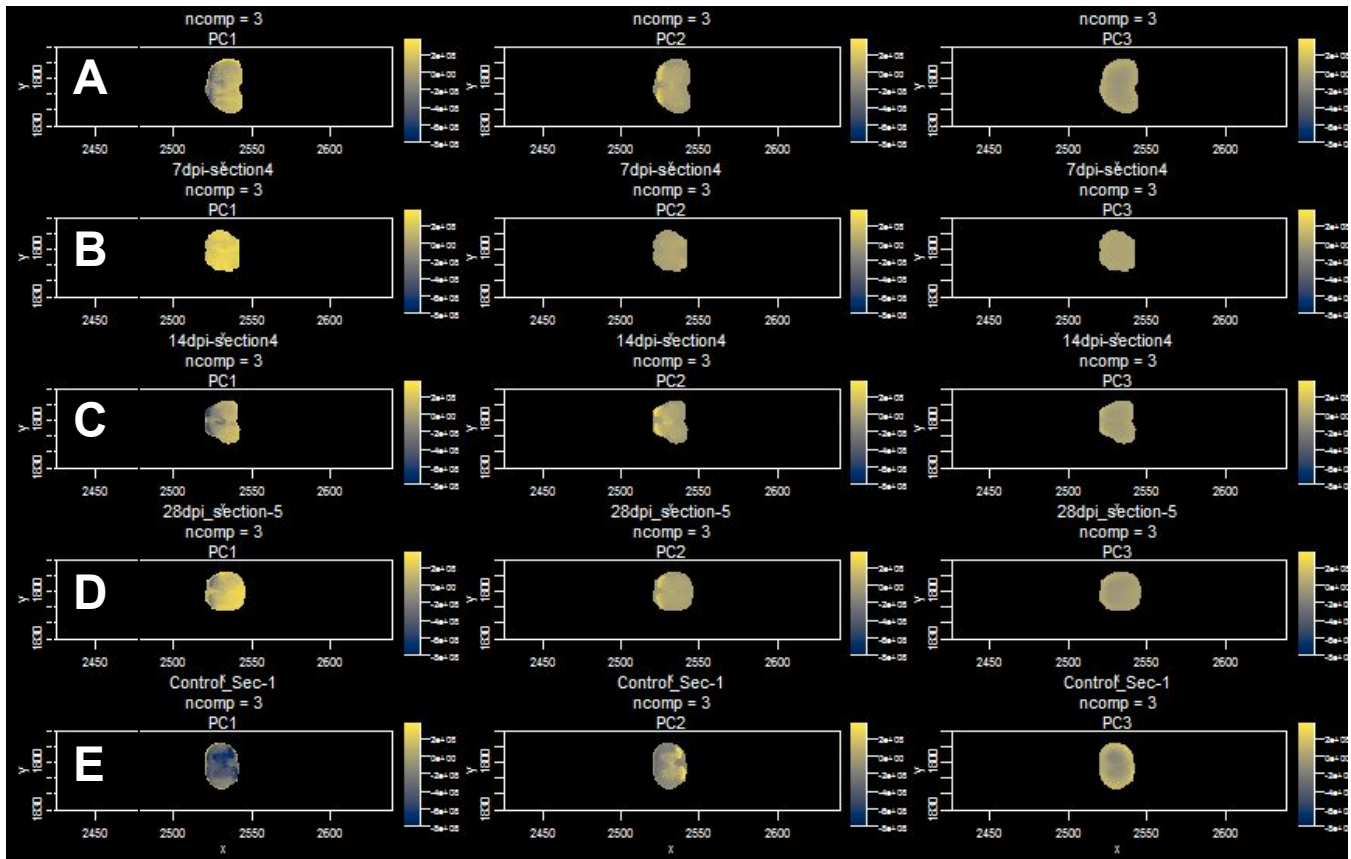

**Supplementary Figure S6.** PCA analysis of the  $m/z$  range 700 – 1000 Da of the top three components in images of A) 3 dpi WT and B) *Shiverer* spinal cord sections. Principle component 1, 2, and 3 are shown from left to right, respectively.

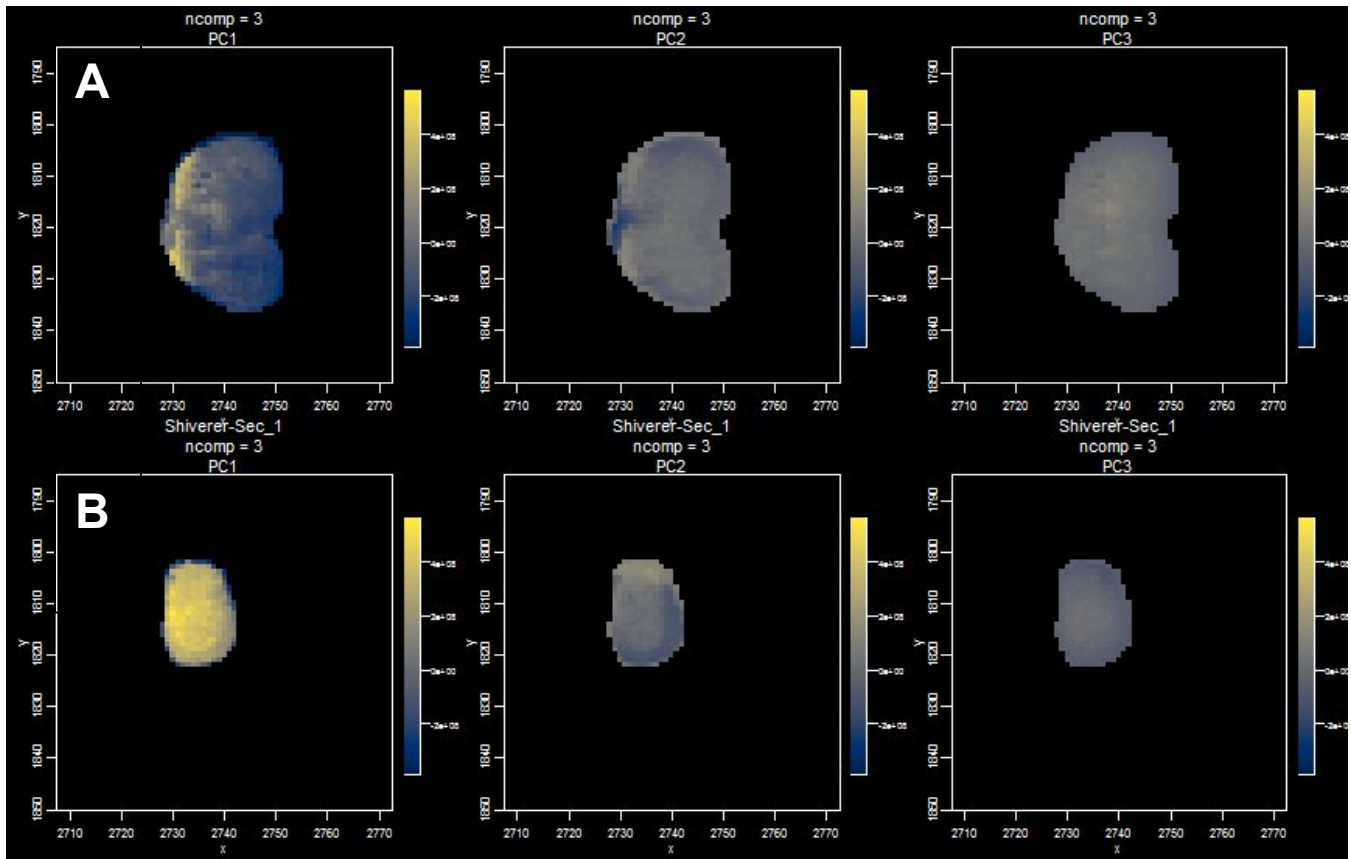

Supplement: NIHMS1754595-supplement-Supplementary_Info.pdf [file NIHMS1754595-supplement-Supplementary_Info.pdf]
